# Supplementary material for: Left Ventricular Systolic Function Has Strong Independent Genetic Background from Diastolic Function: A Classical Twin Study
Source: Medicina (Kaunas). 2021 Sep 5;57(9):935. doi: 10.3390/medicina57090935 (PMC8470958; doi:10.3390/medicina57090935)
Supplement: Supplementary file 1 [file medicina-57-00935-s001.zip › medicina-1305031-supplementary.pdf]

**Supplementary Table S1.** Detailed model information regarding multi-trait classical twin models of systolic measurements.

| Model number | Model name                      | Estimated parameters | Model -2LL | Model df | AIC    | Difference to Full model -2LL | Difference to Full model -df | Difference to Full model <i>p</i> |
|--------------|---------------------------------|----------------------|------------|----------|--------|-------------------------------|------------------------------|-----------------------------------|
| 1            | Cholesky ACE                    | 38                   | 1866.23    | 674      | 518.23 |                               |                              |                                   |
| 2            | Cholesky AE                     | 28                   | 1866.74    | 684      | 498.74 | 0.50                          | 10                           | 1.00                              |
| 3            | Independent pathway ACE         | 32                   | 1866.62    | 680      | 506.62 | 0.38                          | 6                            | 1.00                              |
| 4            | Independent pathway AcEc-AsCsEs | 28                   | 1868.05    | 684      | 500.05 | 1.81                          | 10                           | 1.00                              |
| 5            | Independent pathway AcEc-AsEs   | 24                   | 1868.05    | 688      | 492.05 | 1.81                          | 14                           | 1.00                              |
| 6            | Independent pathway Ac-AsEs     | 20                   | 1874.45    | 692      | 490.45 | 8.21                          | 18                           | 0.98                              |
| 7            | Univariate                      | 20                   | 1876.00    | 692      | 492.00 | 9.76                          | 18                           | 0.94                              |

Detailed results of calculated multi-trait structure equation models. -2LL: minus 2 log-likelihood value; AIC: Akaike information criterion; df: degrees of freedom. Ac: Common genetic factors; Cc: Common environmental factors; Ec: Common unique environmental factors; As: Specific genetic factors; Cs: Specific common environmental factors; Es: Specific unique environmental factors.

**Supplementary Table S2.** Detailed model information regarding multi-trait classical twin models of diastolic measurements

| Model number | Model name                                    | Estimated parameters | Model -2LL | Model df | AIC    | Difference to Full model -2LL | Difference to Full model -df | Difference to Full model <i>p</i> |
|--------------|-----------------------------------------------|----------------------|------------|----------|--------|-------------------------------|------------------------------|-----------------------------------|
| 1            | Cholesky ACE                                  | 24                   | 1231.17    | 492      | 247.17 | -                             | -                            | -                                 |
| 2            | Cholesky AE                                   | 18                   | 1231.44    | 498      | 235.44 | 0.27                          | 6                            | 1.00                              |
| 3            | Independent pathway ACE                       | 24                   | 1240.03    | 492      | 256.03 | 8.86                          | 0                            | -                                 |
| 4            | Independent pathway AcEc-AsCsEs               | 21                   | 1241.36    | 495      | 251.36 | 10.19                         | 3                            | 0.02                              |
| 5            | Independent pathway AcEc-AsEs                 | 18                   | 1241.367   | 498      | 245.36 | 10.19                         | 6                            | 0.12                              |
| 6            | Independent pathway AcEc-AsEs without Ac-LSrE | 17                   | 1241.36    | 499      | 243.36 | 10.19                         | 7                            | 0.18                              |
| 7            | Independent pathway Ac-AsEs                   | 15                   | 1278.05    | 501      | 276.05 | 46.873                        | 9                            | 4.14*10 <sup>-7</sup>             |
| 8            | Univariate                                    | 15                   | 1345.26    | 501      | 343.26 | 114.09                        | 9                            | 2.15*10 <sup>-20</sup>            |

Detailed results of calculated multi-trait structure equation models. -2LL: minus 2 log-likelihood value; AIC: Akaike information criterion; df: degrees of freedom. Ac: Common genetic factors; Cc: Common environmental factors; Ec: Common unique environmental factors; As: Specific genetic factors; Cs: Specific common environmental factors; Es: Specific unique environmental factors.

**Supplementary Table S3.** Detailed model information regarding multi-trait classical twin models of systolic and diastolic measurements

| Model number | Model name                                                 | Estimated parameters | Model -2LL | Model df | AIC    | Difference to Full model -2LL | Difference to Full model -df | Difference to Full model p |
|--------------|------------------------------------------------------------|----------------------|------------|----------|--------|-------------------------------|------------------------------|----------------------------|
| 1            | Cholesky ACE                                               | 38                   | 1675.17    | 650      | 375.17 |                               |                              |                            |
| 2            | Cholesky AE                                                | 28                   | 1675.72    | 660      | 355.72 | 0.55                          | 10                           | 1.00                       |
| 3            | Independent pathway ACE                                    | 32                   | 1687.60    | 656      | 375.60 | 12.43                         | 6                            | 0.05                       |
| 4            | Independent pathway AcEc-AsCsEs                            | 28                   | 1689.98    | 660      | 369.98 | 14.80                         | 10                           | 0.14                       |
| 5            | Independent pathway AcEc-AsEs                              | 24                   | 1689.98    | 664      | 361.98 | 14.80                         | 14                           | 0.39                       |
| 6            | Independent pathway AcEc-AsEs without AcEc-GLS             | 22                   | 1696.48    | 666      | 364.48 | 21.31                         | 16                           | 0.17                       |
| 7            | Independent pathway AcEc-AsEs without AcEc-GLS and As-LSrE | 21                   | 1696.48    | 667      | 362.48 | 21.31                         | 17                           | 0.21                       |
| 8            | Independent pathway Ac-AsEs                                | 20                   | 1726.45    | 668      | 390.45 | 51.28                         | 18                           | 4.82*10 <sup>-5</sup>      |
| 9            | Univariate                                                 | 20                   | 1800.39    | 668      | 464.39 | 125.21                        | 18                           | 4.32*10 <sup>-18</sup>     |

Detailed results of calculated multi-trait structure equation models. -2LL: minus 2 log-likelihood value; AIC: Akaike information criterion; df: degrees of freedom. Ac: Common genetic factors; Cc: Common environmental factors; Ec: Common unique environmental factors; As: Specific genetic factors; Cs: Specific common environmental factors; Es: Specific unique environmental factors.
